# Supplementary material for: Analysis and Computational Dissection of Molecular Signature Multiplicity
Source: PLoS Comput Biol. 2010 May 20;6(5):e1000790. doi: 10.1371/journal.pcbi.1000790 (PMC2873900; doi:10.1371/journal.pcbi.1000790)
Supplement: Figure S1 — Example pathway structure with 3 gene variables (A, B, C) and phenotypic response variable T. (0.02 MB PDF) [file pcbi.1000790.s001.pdf]

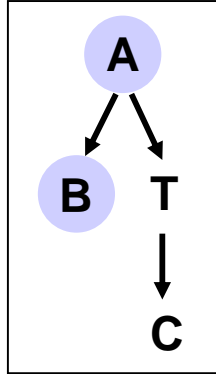

| P(A)  |     |
|-------|-----|
| A = 0 | 0.5 |
| A = 1 | 0.3 |
| A = 2 | 0.2 |

| P(T   A) | A = 0 | A = 1 | A = 2 |
|----------|-------|-------|-------|
| T = 0    | 1     | 1     | 0     |
| T = 1    | 0     | 0     | 0.3   |
| T = 2    | 0     | 0     | 0.7   |

| P(B   A) | A = 0 | A = 1 | A = 2 |
|----------|-------|-------|-------|
| B = 0    | 0.2   | 0.9   | 0     |
| B = 1    | 0.8   | 0.1   | 0     |
| B = 2    | 0     | 0     | 1     |

| P(C   T) | T = 0 | T = 1 | T = 2 |
|----------|-------|-------|-------|
| C = 0    | 0.2   | 0.9   | 0.3   |
| C = 1    | 0.8   | 0.1   | 0.7   |

**Figure S1:** Example pathway structure with 3 gene variables ( $A$ ,  $B$ ,  $C$ ) and phenotypic response variable  $T$ . The structure is represented by a Bayesian network (defined as a set of variables  $\mathbf{V}$ , a directed acyclic graph  $G$  with one-to-one correspondence of nodes to the variables in  $\mathbf{V}$ , and a probability distribution  $P$  over  $\mathbf{V}$  such that every variable  $W$  in  $\mathbf{V}$  is independent of all non-descendants of  $W$  given the parents of  $W$ ). The network parameterization is defined below the graph. All variables take values  $\{0,1,2\}$  except for  $C$  that takes values  $\{0,1\}$ . Genes  $A$  and  $B$  contain exactly the same information about  $T$  and are highlighted with the same color.
