# Supplementary material for: Analysis and Computational Dissection of Molecular Signature Multiplicity
Source: PubMed Central journal article supplement (PMC2873900; doi:10.1371/journal.pcbi.1000790), 2010-05-20
Supplement: pcbi.1000790.s002.pdf [file pcbi.1000790.s002.pdf]

**Algorithm HITON-PC** (without “symmetry correction”)

**Input:** dataset with predictive variables (e.g., genes)  $\mathbf{V}$ , including a phenotypic response variable  $T$

**Output:** a Markov boundary  $\mathbf{M}$  of  $T$

1. Initialize  $\mathbf{M}$  with an empty set
2. Initialize the set of eligible variables  $\mathbf{E} \leftarrow \mathbf{V} \setminus \{T\}$
3. Sort in descending order the variables in  $\mathbf{E}$  according to their pairwise association with response variable  $T$
4. Remove from  $\mathbf{E}$  all variables  $X$  with zero association with  $T$ , i.e. when  $T \perp X$
5. Repeat
6.      $X \leftarrow$  first variable in  $\mathbf{E}$
7.     Add  $X$  to  $\mathbf{M}$  and remove it from  $\mathbf{E}$
8.     If  $\exists \mathbf{Z} \subseteq \mathbf{M} \setminus \{X\}$ , such that  $T \perp X \mid \mathbf{Z}$ , remove  $X$  from  $\mathbf{M}$
9. Until  $\mathbf{E}$  is empty
10. For each  $X \in \mathbf{M}$
11.     If  $\exists \mathbf{Z} \subseteq \mathbf{M} \setminus \{X\}$ , such that  $T \perp X \mid \mathbf{Z}$ , remove  $X$  from  $\mathbf{M}$
12. Output  $\mathbf{M}$

**Figure S2:** HITON-PC algorithm. More details about the algorithm and characterization of distributions where it can correctly identify a Markov boundary are given in [1,2].

## References

1. Aliferis CF, Statnikov A, Tsamardinos I, Mani S, Koutsoukos XD (2010) Local Causal and Markov Blanket Induction for Causal Discovery and Feature Selection for Classification. Part II: Analysis and Extensions. Journal of Machine Learning Research 11: 235-284.
2. Aliferis CF, Statnikov A, Tsamardinos I, Mani S, Koutsoukos XD (2010) Local Causal and Markov Blanket Induction for Causal Discovery and Feature Selection for Classification. Part I: Algorithms and Empirical Evaluation. Journal of Machine Learning Research 11: 171-234.
