# Supplementary material for: Analysis and Computational Dissection of Molecular Signature Multiplicity
Source: PubMed Central journal article supplement (PMC2873900; doi:10.1371/journal.pcbi.1000790), 2010-05-20
Supplement: pcbi.1000790.s003.pdf [file pcbi.1000790.s003.pdf]

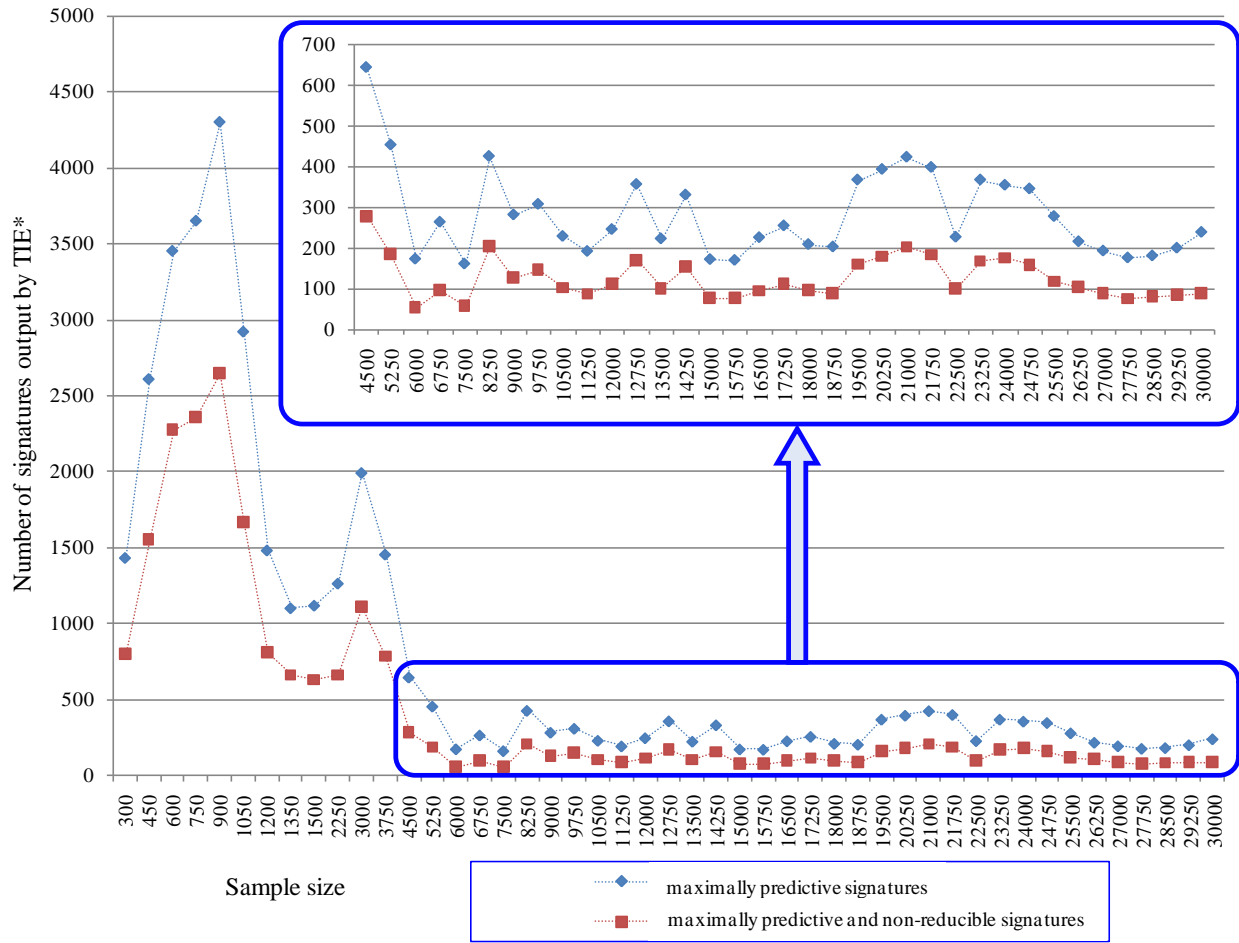

**Figure S3:** Number of signatures output by TIE\* as sample size grows. The inner figure is a magnified region of the main figure.
