# Supplementary material for: Analysis and Computational Dissection of Molecular Signature Multiplicity
Source: PubMed Central journal article supplement (PMC2873900; doi:10.1371/journal.pcbi.1000790), 2010-05-20
Supplement: pcbi.1000790.s004.pdf [file pcbi.1000790.s004.pdf]

| Task                                                                                                                                                             | Discovery dataset |             |                                                                |                 |                     | Validation dataset |             |                                                               |                 |                     | Number of common genes |
|------------------------------------------------------------------------------------------------------------------------------------------------------------------|-------------------|-------------|----------------------------------------------------------------|-----------------|---------------------|--------------------|-------------|---------------------------------------------------------------|-----------------|---------------------|------------------------|
|                                                                                                                                                                  | Reference         | Sample size | Samples per class                                              | Number of genes | Microarray platform | Reference          | Sample size | Samples per class                                             | Number of genes | Microarray platform |                        |
| <b><u>Lung Cancer Diagnosis:</u></b> lung tumors vs. normals (non-tumor lung samples)                                                                            | [1]               | 203         | lung tumors ( <b>186</b> ) normals ( <b>17</b> )               | 12600           | Affymetrix U95A     | [2]                | 96          | lung tumors ( <b>86</b> ) normals ( <b>10</b> )               | 7129            | Affymetrix HuGeneFL | 7094                   |
| <b><u>Lung Cancer Subtype Classification:</u></b> adenocarcinoma vs. squamous cell carcinoma lung tumors                                                         | [1]               | 160         | adenocarcinoma ( <b>139</b> ) squamous ( <b>21</b> )           | 12600           | Affymetrix U95A     | [3]                | 28          | adenocarcinoma ( <b>14</b> ) squamous ( <b>14</b> )           | 12533           | Affymetrix U95A     | 12533                  |
| <b><u>Breast Cancer Subtype Classification:</u></b> estrogen receptor positive (ER+) vs. ER- breast tumors; untreated patients                                   | [4]               | 286         | ER+ ( <b>209</b> ) ER- ( <b>77</b> )                           | 22283           | Affymetrix U133A    | [5]                | 119         | ER+ ( <b>85</b> ) ER- ( <b>34</b> )                           | 22283           | Affymetrix U133A    | 22283                  |
| <b><u>Breast Cancer 5 Yr. Prognosis:</u></b> ER+ patients who developed distant metastases within 5 years (poor prognosis) vs. ones who did not (good prognosis) | [4]               | 204         | poor prognosis ( <b>66</b> ) good prognosis ( <b>138</b> )     | 22283           | Affymetrix U133A    | [5]                | 72          | poor prognosis ( <b>13</b> ) good prognosis ( <b>59</b> )     | 22283           | Affymetrix U133A    | 22283                  |
| <b><u>Glioma Subtype Classification:</u></b> grade III vs. grade IV glioma tumors                                                                                | [6]               | 100         | grade III ( <b>24</b> ) grade IV ( <b>76</b> )                 | 22283           | Affymetrix U133A    | [7]                | 85          | grade III ( <b>26</b> ) grade IV ( <b>59</b> )                | 22283           | Affymetrix U133A    | 22283                  |
| <b><u>Leukemia 5 Yr. Prognosis:</u></b> patients with disease-free survival < 5 years (ones who had relapse or competing events within 5 years) vs. > 5 years    | [8]               | 164         | survival < 5 yr. ( <b>29</b> ) survival > 5 yr. ( <b>135</b> ) | 12625           | Affymetrix U95A     | [9]                | 79          | survival < 5 yr. ( <b>18</b> ) survival > 5 yr. ( <b>61</b> ) | 22283           | Affymetrix U133A    | 10507                  |

**Table S1:** Gene expression microarray datasets used in this work.

## References

1. Bhattacharjee A, Richards WG, Staunton J, Li C, Monti S, Vasa P, Ladd C, Beheshti J, Bueno R, Gillette M, Loda M, Weber G, Mark EJ, Lander ES, Wong W, Johnson BE, Golub TR, Sugarbaker DJ, Meyerson M (2001) Classification of human lung carcinomas by mRNA expression profiling reveals distinct adenocarcinoma subclasses. *Proc Natl Acad Sci U S A* 98: 13790-13795.
2. Beer DG, Kardia SL, Huang CC, Giordano TJ, Levin AM, Misek DE, Lin L, Chen G, Gharib TG, Thomas DG, Lizyness ML, Kuick R, Hayasaka S, Taylor JM, Iannettoni MD, Orringer MB, Hanash S (2002) Gene-expression profiles predict survival of patients with lung adenocarcinoma. *Nat Med* 8: 816-824.
3. Su AI, Welsh JB, Sapinoso LM, Kern SG, Dimitrov P, Lapp H, Schultz PG, Powell SM, Moskaluk CA, Frierson HF, Jr., Hampton GM (2001) Molecular classification of human carcinomas by use of gene expression signatures. *Cancer Res* 61: 7388-7393.
4. Wang Y, Klijn JG, Zhang Y, Sieuwerts AM, Look MP, Yang F, Talantov D, Timmermans M, Meijer-van Gelder ME, Yu J, Jatkoe T, Berns EM, Atkins D, Foekens JA (2005) Gene-expression profiles to predict distant metastasis of lymph-node-negative primary breast cancer. *Lancet* 365: 671-679.
5. Sotiriou C, Wirapati P, Loi S, Harris A, Fox S, Smeds J, Nordgren H, Farmer P, Praz V, Haibe-Kains B, Desmedt C, Larsimont D, Cardoso F, Peterse H, Nuyten D, Buyse M, van de V, Bergh J, Piccart M, Delorenzi M (2006) Gene expression profiling in breast cancer: understanding the molecular basis of histologic grade to improve prognosis. *J Natl Cancer Inst* 98: 262-272.
6. Phillips HS, Kharbanda S, Chen R, Forrest WF, Soriano RH, Wu TD, Misra A, Nigro JM, Colman H, Soroceanu L, Williams PM, Modrusan Z, Feuerstein BG, Aldape K (2006) Molecular subclasses of high-grade glioma predict prognosis, delineate a pattern of disease progression, and resemble stages in neurogenesis. *Cancer Cell* 9: 157-173.
7. Freije WA, Castro-Vargas FE, Fang Z, Horvath S, Cloughesy T, Liau LM, Mischel PS, Nelson SF (2004) Gene expression profiling of gliomas strongly predicts survival. *Cancer Res* 64: 6503-6510.
8. Yeoh EJ, Ross ME, Shurtleff SA, Williams WK, Patel D, Mahfouz R, Behm FG, Raimondi SC, Relling MV, Patel A, Cheng C, Campana D, Wilkins D, Zhou X, Li J, Liu H, Pui CH, Evans WE, Naeve C, Wong L, Downing JR (2002) Classification, subtype discovery, and prediction of outcome in pediatric acute lymphoblastic leukemia by gene expression profiling. *Cancer Cell* 1: 133-143.

9. Ross ME, Zhou X, Song G, Shurtleff SA, Girtman K, Williams WK, Liu HC, Mahfouz R, Raimondi SC, Lenny N, Patel A, Downing JR (2003) Classification of pediatric acute lymphoblastic leukemia by gene expression profiling. *Blood* 102: 2951-2959.
