# Supplementary material for: Analysis and Computational Dissection of Molecular Signature Multiplicity
Source: PubMed Central journal article supplement (PMC2873900; doi:10.1371/journal.pcbi.1000790), 2010-05-20
Supplement: pcbi.1000790.s005.pdf [file pcbi.1000790.s005.pdf]

| <i>Method</i>          | Total number of output signatures | Number of variables in an average output signature | Number of true signatures |                                     | Average number of redundant variables in identified true signatures | Average classification performance in validation data | CPU time in minutes |
|------------------------|-----------------------------------|----------------------------------------------------|---------------------------|-------------------------------------|---------------------------------------------------------------------|-------------------------------------------------------|---------------------|
|                        |                                   |                                                    | identified exactly        | identified with redundant variables |                                                                     |                                                       |                     |
| TIE*                   | 72                                | 5.00                                               | 72                        | 72                                  | 0.00                                                                | 0.951                                                 | 0.39                |
| Iterative Removal      | 3                                 | 4.67                                               | 0                         | 1                                   | 1.00                                                                | 0.946                                                 | 0.01                |
| KIAMB1                 | 5000                              | 2.83                                               | 0                         | 0                                   | N/A                                                                 | 0.776                                                 | 11.55               |
| KIAMB2                 | 5000                              | 2.82                                               | 0                         | 0                                   | N/A                                                                 | 0.772                                                 | 11.69               |
| KIAMB3                 | 5000                              | 2.81                                               | 0                         | 0                                   | N/A                                                                 | 0.774                                                 | 11.62               |
| Resampling+Univariate1 | 5000                              | 17.87                                              | 0                         | 72                                  | 12.00                                                               | 0.949                                                 | 84.56               |
| Resampling+Univariate2 | 5000                              | 7.54                                               | 0                         | 25                                  | 12.12                                                               | 0.924                                                 | 85.50               |
| Resampling+RFE1        | 5000                              | 14.25                                              | 0                         | 72                                  | 5.01                                                                | 0.954                                                 | 78.71               |
| Resampling+RFE2        | 5000                              | 5.80                                               | 1                         | 44                                  | 4.25                                                                | 0.939                                                 | 79.26               |

**Table S2:** Results of experiments with artificial dataset with 30 variables. 72 true maximally predictive and non-redundant signatures exist in this dataset. The optimal Bayes classification performance is 0.9663 (weighted accuracy).
