# Supplementary material for: Analysis and Computational Dissection of Molecular Signature Multiplicity
Source: PubMed Central journal article supplement (PMC2873900; doi:10.1371/journal.pcbi.1000790), 2010-05-20
Supplement: pcbi.1000790.s006.pdf [file pcbi.1000790.s006.pdf]

| <i>Method</i>          | Total number of output signatures | Number of variables in an average output signature | Number of true signatures |                                     | Average number of redundant variables in identified true signatures | Average classification performance in validation data | CPU time in minutes |
|------------------------|-----------------------------------|----------------------------------------------------|---------------------------|-------------------------------------|---------------------------------------------------------------------|-------------------------------------------------------|---------------------|
|                        |                                   |                                                    | identified exactly        | identified with redundant variables |                                                                     |                                                       |                     |
| TIE*                   | 72                                | 5.00                                               | 72                        | 72                                  | 0.00                                                                | 0.957                                                 | 0.46                |
| Iterative Removal      | 3                                 | 5.67                                               | 0                         | 1                                   | 2.00                                                                | 0.959                                                 | 0.04                |
| KIAMB1                 | 5000                              | 2.82                                               | 0                         | 0                                   | N/A                                                                 | 0.798                                                 | 285.42              |
| KIAMB2                 | 5000                              | 2.81                                               | 0                         | 0                                   | N/A                                                                 | 0.796                                                 | 285.45              |
| KIAMB3                 | 5000                              | 2.80                                               | 0                         | 0                                   | N/A                                                                 | 0.796                                                 | 285.48              |
| Resampling+Univariate1 | 5000                              | 11.10                                              | 0                         | 72                                  | 12.29                                                               | 0.942                                                 | 5999.64             |
| Resampling+Univariate2 | 5000                              | 5.58                                               | 0                         | 0                                   | N/A                                                                 | 0.934                                                 | 6000.41             |
| Resampling+RFE1        | 5000                              | 8.70                                               | 0                         | 72                                  | 6.38                                                                | 0.952                                                 | 6235.28             |
| Resampling+RFE2        | 5000                              | 4.24                                               | 0                         | 29                                  | 5.76                                                                | 0.947                                                 | 6235.93             |

**Table S3:** Results of experiments with artificial dataset with 1,000 variables. 72 true maximally predictive and non-redundant signatures exist in this dataset.
