# Supplementary material for: Analysis and Computational Dissection of Molecular Signature Multiplicity
Source: PubMed Central journal article supplement (PMC2873900; doi:10.1371/journal.pcbi.1000790), 2010-05-20
Supplement: pcbi.1000790.s007.pdf [file pcbi.1000790.s007.pdf]

### Lung Cancer Diagnosis

| Method to induce multiple signatures | Number of signatures | Number of genes in a signature |              | Classification performance (AUC) |                 |                       |                 |
|--------------------------------------|----------------------|--------------------------------|--------------|----------------------------------|-----------------|-----------------------|-----------------|
|                                      |                      | mean                           | 95% interval | In discovery dataset             |                 | In validation dataset |                 |
|                                      |                      |                                |              | mean                             | 95% interval    | mean                  | 95% interval    |
| TIE*                                 | 348/348/187          | 6                              | [4 - 8]      | 0.999                            | [0.994 - 1.000] | 0.998                 | [0.988 - 1.000] |
| Resampling+SVM-RFE1                  | 5000/2966/48         | 9                              | [1 - 43]     | 0.987                            | [0.919 - 1.000] | 0.989                 | [0.949 - 1.000] |
| Resampling+SVM-RFE2                  | 5000/341/61          | 1                              | [1 - 2]      | 0.967                            | [0.861 - 1.000] | 0.962                 | [0.633 - 1.000] |
| Resampling+Univariate1               | 5000/2199/19         | 19                             | [1 - 62]     | 0.99                             | [0.919 - 1.000] | 0.992                 | [0.949 - 1.000] |
| Resampling+Univariate2               | 5000/294/58          | 1                              | [1 - 2]      | 0.969                            | [0.861 - 1.000] | 0.973                 | [0.887 - 1.000] |
| KIAMB1                               | 985/985/985          | 41                             | [39 - 42]    | 0.999                            | [0.990 - 1.000] | 0.995                 | [0.984 - 1.000] |
| KIAMB2                               | 1489/1320/1246       | 48                             | [12 - 68]    | 0.999                            | [0.990 - 1.000] | 0.995                 | [0.978 - 1.000] |
| KIAMB3                               | 5000/271/157         | 9                              | [6 - 15]     | 0.996                            | [0.981 - 1.000] | 0.997                 | [0.992 - 1.000] |
| Iterative Removal                    | 51/51/51             | 7                              | [5 - 10]     | 0.987                            | [0.919 - 1.000] | 0.977                 | [0.880 - 1.000] |

### Lung Cancer Subtype Classification

| Method to induce multiple signatures | Number of signatures | Number of genes in a signature |              | Classification performance (AUC) |                 |                       |                 |
|--------------------------------------|----------------------|--------------------------------|--------------|----------------------------------|-----------------|-----------------------|-----------------|
|                                      |                      | mean                           | 95% interval | In discovery dataset             |                 | In validation dataset |                 |
|                                      |                      |                                |              | mean                             | 95% interval    | mean                  | 95% interval    |
| TIE*                                 | 668/668/413          | 7                              | [5 - 8]      | 0.987                            | [0.973 - 1.000] | 0.973                 | [0.929 - 1.000] |
| Resampling+SVM-RFE1                  | 5000/4267/20         | 392                            | [1 - 5037]   | 0.98                             | [0.909 - 1.000] | 0.978                 | [0.888 - 1.000] |
| Resampling+SVM-RFE2                  | 5000/1206/107        | 2                              | [1 - 5]      | 0.925                            | [0.650 - 0.985] | 0.914                 | [0.668 - 0.995] |
| Resampling+Univariate1               | 5000/4590/55         | 528                            | [1 - 8703]   | 0.98                             | [0.903 - 1.000] | 0.98                  | [0.883 - 1.000] |
| Resampling+Univariate2               | 5000/917/81          | 3                              | [1 - 6]      | 0.922                            | [0.839 - 0.988] | 0.916                 | [0.770 - 0.985] |
| KIAMB1                               | 994/968/965          | 26                             | [24 - 26]    | 0.986                            | [0.967 - 1.000] | 0.982                 | [0.923 - 1.000] |
| KIAMB2                               | 1006/1005/1005       | 48                             | [47 - 50]    | 0.99                             | [0.973 - 1.000] | 0.982                 | [0.923 - 1.000] |
| KIAMB3                               | 3520/1364/1209       | 16                             | [8 - 31]     | 0.98                             | [0.948 - 0.997] | 0.982                 | [0.923 - 1.000] |
| Iterative Removal                    | 29/29/29             | 8                              | [5 - 12]     | 0.978                            | [0.867 - 1.000] | 0.972                 | [0.882 - 1.000] |

### Breast Cancer Subtype Classification

| Method to induce multiple signatures | Number of signatures | Number of genes in a signature |              | Classification performance (AUC) |                 |                       |                 |
|--------------------------------------|----------------------|--------------------------------|--------------|----------------------------------|-----------------|-----------------------|-----------------|
|                                      |                      | mean                           | 95% interval | In discovery dataset             |                 | In validation dataset |                 |
|                                      |                      |                                |              | mean                             | 95% interval    | mean                  | 95% interval    |
| TIE*                                 | 2776/2776/1602       | 17                             | [14 - 21]    | 0.847                            | [0.824 - 0.873] | 0.887                 | [0.852 - 0.916] |
| Resampling+SVM-RFE1                  | 5000/4601/22         | 1627                           | [1 - 10746]  | 0.845                            | [0.821 - 0.888] | 0.812                 | [0.604 - 0.893] |
| Resampling+SVM-RFE2                  | 5000/2033/65         | 18                             | [1 - 135]    | 0.858                            | [0.736 - 0.930] | 0.761                 | [0.554 - 0.874] |
| Resampling+Univariate1               | 5000/4122/15         | 3560                           | [1 - 22283]  | 0.857                            | [0.826 - 0.920] | 0.823                 | [0.771 - 0.877] |
| Resampling+Univariate2               | 5000/794/22          | 7                              | [1 - 18]     | 0.873                            | [0.754 - 0.930] | 0.814                 | [0.725 - 0.874] |
| KIAMB1                               | 983/970/960          | 31                             | [30 - 32]    | 0.85                             | [0.804 - 0.883] | 0.68                  | [0.427 - 0.846] |
| KIAMB2                               | 994/964/962          | 28                             | [27 - 29]    | 0.85                             | [0.802 - 0.884] | 0.685                 | [0.418 - 0.850] |
| KIAMB3                               | 943/570/493          | 14                             | [12 - 15]    | 0.856                            | [0.786 - 0.884] | 0.694                 | [0.432 - 0.851] |
| Iterative Removal                    | 34/34/34             | 19                             | [14 - 23]    | 0.833                            | [0.793 - 0.866] | 0.834                 | [0.720 - 0.899] |

**Table S4 (continued on the next page):** Results for the number of output signatures (total/unique/unique and non-reducible), number of genes in a signature, and classification performance in discovery and validation microarray datasets. The length of highlighting corresponds to magnitude of the value (number of genes in a signature or classification performance) relative to other multiple signature extraction methods. The 95% intervals correspond to the observed [2.5 - 97.5] percentile interval over multiple signatures discovered by the method. Uniqueness and non-reducibility of each signature is assessed relative to the output of the corresponding signature extraction method.

**Breast Cancer 5 Yr. Prognosis**

| Method to induce multiple signatures | Number of signatures | Number of genes in a signature |              | Classification performance (AUC) |                 |                       |                 |
|--------------------------------------|----------------------|--------------------------------|--------------|----------------------------------|-----------------|-----------------------|-----------------|
|                                      |                      | mean                           | 95% interval | In discovery dataset             |                 | In validation dataset |                 |
|                                      |                      |                                |              | mean                             | 95% interval    | mean                  | 95% interval    |
| TIE*                                 | 5342/5342/3321       | 84                             | [81 - 89]    | 0.671                            | [0.658 - 0.686] | 0.697                 | [0.674 - 0.720] |
| Resampling+SVM-RFE1                  | 5000/4755/42         | 4687                           | [2 - 22283]  | 0.684                            | [0.541 - 0.746] | 0.64                  | [0.487 - 0.752] |
| Resampling+SVM-RFE2                  | 5000/3407/350        | 56                             | [1 - 404]    | 0.586                            | [0.413 - 0.719] | 0.598                 | [0.398 - 0.822] |
| Resampling+Univariate1               | 5000/4002/29         | 5791                           | [1 - 22283]  | 0.685                            | [0.573 - 0.741] | 0.645                 | [0.468 - 0.801] |
| Resampling+Univariate2               | 5000/2573/139        | 44                             | [1 - 162]    | 0.62                             | [0.467 - 0.712] | 0.628                 | [0.411 - 0.807] |
| KIAMB1                               | 986/552/550          | 14                             | [14 - 14]    | 0.596                            | [0.507 - 0.693] | 0.562                 | [0.399 - 0.716] |
| KIAMB2                               | 988/969/955          | 28                             | [27 - 29]    | 0.595                            | [0.482 - 0.708] | 0.562                 | [0.390 - 0.713] |
| KIAMB3                               | 1182/916/889         | 23                             | [12 - 28]    | 0.596                            | [0.483 - 0.704] | 0.567                 | [0.394 - 0.724] |
| Iterative Removal                    | 31/31/31             | 28                             | [12 - 82]    | 0.69                             | [0.589 - 0.794] | 0.606                 | [0.434 - 0.735] |

**Glioma Subtype Classification**

| Method to induce multiple signatures | Number of signatures | Number of genes in a signature |              | Classification performance (AUC) |                 |                       |                 |
|--------------------------------------|----------------------|--------------------------------|--------------|----------------------------------|-----------------|-----------------------|-----------------|
|                                      |                      | mean                           | 95% interval | In discovery dataset             |                 | In validation dataset |                 |
|                                      |                      |                                |              | mean                             | 95% interval    | mean                  | 95% interval    |
| TIE*                                 | 5753/5753/4588       | 46                             | [45 - 53]    | 0.871                            | [0.860 - 0.885] | 0.844                 | [0.830 - 0.860] |
| Resampling+SVM-RFE1                  | 5000/4255/43         | 301                            | [2 - 3599]   | 0.808                            | [0.630 - 0.915] | 0.74                  | [0.528 - 0.880] |
| Resampling+SVM-RFE2                  | 5000/2055/126        | 3                              | [1 - 13]     | 0.694                            | [0.545 - 0.890] | 0.637                 | [0.463 - 0.830] |
| Resampling+Univariate1               | 5000/4751/63         | 925                            | [2 - 17022]  | 0.84                             | [0.690 - 0.905] | 0.818                 | [0.554 - 0.919] |
| Resampling+Univariate2               | 5000/1926/117        | 3                              | [1 - 15]     | 0.74                             | [0.495 - 0.900] | 0.65                  | [0.450 - 0.860] |
| KIAMB1                               | 973/658/654          | 15                             | [15 - 15]    | 0.765                            | [0.675 - 0.865] | 0.71                  | [0.558 - 0.811] |
| KIAMB2                               | 974/964/964          | 30                             | [29 - 30]    | 0.781                            | [0.685 - 0.880] | 0.732                 | [0.610 - 0.832] |
| KIAMB3                               | 1408/786/746         | 21                             | [6 - 30]     | 0.77                             | [0.685 - 0.865] | 0.728                 | [0.588 - 0.821] |
| Iterative Removal                    | 58/58/58             | 24                             | [15 - 44]    | 0.847                            | [0.744 - 0.921] | 0.842                 | [0.743 - 0.914] |

**Leukemia 5 Yr. Prognosis**

| Method to induce multiple signatures | Number of signatures | Number of genes in a signature |              | Classification performance (AUC) |                 |                       |                 |
|--------------------------------------|----------------------|--------------------------------|--------------|----------------------------------|-----------------|-----------------------|-----------------|
|                                      |                      | mean                           | 95% interval | In discovery dataset             |                 | In validation dataset |                 |
|                                      |                      |                                |              | mean                             | 95% interval    | mean                  | 95% interval    |
| TIE*                                 | 1804/1804/1561       | 22                             | [20 - 28]    | 0.714                            | [0.647 - 0.805] | 0.711                 | [0.631 - 0.784] |
| Resampling+SVM-RFE1                  | 5000/4643/158        | 1984                           | [1 - 8756]   | 0.631                            | [0.422 - 0.741] | 0.612                 | [0.440 - 0.725] |
| Resampling+SVM-RFE2                  | 5000/2537/570        | 15                             | [1 - 92]     | 0.543                            | [0.341 - 0.749] | 0.55                  | [0.356 - 0.725] |
| Resampling+Univariate1               | 5000/3897/116        | 4024                           | [1 - 10507]  | 0.649                            | [0.431 - 0.756] | 0.606                 | [0.419 - 0.717] |
| Resampling+Univariate2               | 5000/2516/465        | 48                             | [1 - 329]    | 0.539                            | [0.235 - 0.756] | 0.529                 | [0.342 - 0.725] |
| KIAMB1                               | 988/984/984          | 31                             | [29 - 31]    | 0.515                            | [0.351 - 0.681] | 0.603                 | [0.445 - 0.735] |
| KIAMB2                               | 1213/1131/1127       | 46                             | [13 - 56]    | 0.517                            | [0.341 - 0.687] | 0.602                 | [0.460 - 0.732] |
| KIAMB3                               | 4485/30/30           | 7                              | [6 - 10]     | 0.438                            | [0.348 - 0.632] | 0.563                 | [0.530 - 0.760] |
| Iterative Removal                    | 2/2/2                | 21                             | [19 - 23]    | 0.673                            | [0.630 - 0.716] | 0.652                 | [0.550 - 0.753] |

**Table S4 (continued from the previous page)**
