# Supplementary material for: Analysis and Computational Dissection of Molecular Signature Multiplicity
Source: PubMed Central journal article supplement (PMC2873900; doi:10.1371/journal.pcbi.1000790), 2010-05-20
Supplement: pcbi.1000790.s008.pdf [file pcbi.1000790.s008.pdf]

| <i>Task</i>                                 | Number of genes common in X% of discovered signatures |     |     |     |     |      |
|---------------------------------------------|-------------------------------------------------------|-----|-----|-----|-----|------|
|                                             | 50%                                                   | 60% | 70% | 80% | 90% | 100% |
| <i>Lung Cancer Diagnosis</i>                | 4                                                     | 0   | 0   | 0   | 0   | 0    |
| <i>Lung Cancer Subtype Classification</i>   | 5                                                     | 0   | 0   | 0   | 0   | 0    |
| <i>Breast Cancer Subtype Classification</i> | 15                                                    | 11  | 4   | 1   | 0   | 0    |
| <i>Breast Cancer 5 Yr. Prognosis</i>        | 85                                                    | 85  | 84  | 84  | 84  | 1    |
| <i>Glioma Subtype Classification</i>        | 48                                                    | 48  | 48  | 47  | 41  | 0    |
| <i>Leukemia 5 Yr. Prognosis</i>             | 23                                                    | 23  | 23  | 20  | 1   | 0    |

**Table S5:** Number of common genes in 50%, 60%, ..., 100% of signatures discovered by TIE\* algorithm for each dataset.
