# Supplementary material for: Analysis and Computational Dissection of Molecular Signature Multiplicity
Source: PubMed Central journal article supplement (PMC2873900; doi:10.1371/journal.pcbi.1000790), 2010-05-20
Supplement: pcbi.1000790.s009.pdf [file pcbi.1000790.s009.pdf]

## Maximally predictive and non-redundant molecular signatures are precisely the Markov boundaries and vice-versa

In the present paper capital letters in italics denote variables (e.g.,  $A$ ,  $B$ ,  $C$ ) and bold letters denote variable sets (e.g.,  $\mathbf{X}$ ,  $\mathbf{Y}$ ,  $\mathbf{Z}$ ). We also adopt the following standard notation of statistical independence relations:  $T \perp \mathbf{A}$  means that  $T$  is independent of the variable set  $\mathbf{A}$ . Similarly, if  $T$  is independent of the variable set  $\mathbf{A}$  conditioned the variable set  $\mathbf{B}$ , we denote this as  $T \perp \mathbf{A} | \mathbf{B}$ . If we use the sign “ $\perp$ ” instead of “ $\perp$ ”, this means dependence instead of independence.

Now we introduce several key definitions:

- **Molecular signature:** A molecular signature is a mathematical/computational model (e.g., classifier or regression model) that predicts a phenotypic response variable of interest  $T$  (e.g., diagnosis or response to treatment in human patients) given values of molecular variables (e.g., gene expression values).
- **Maximally predictive molecular signature:** A maximally predictive molecular signature is a molecular signature that maximizes predictivity of the phenotypic response variable  $T$  relative to all other signatures that can be constructed from the given dataset.
- **Maximally predictive and non-redundant molecular signature:** A maximally predictive and non-redundant molecular signature based on variables  $\mathbf{X}$  is a maximally predictive signature such that any signature based on a proper subset of variables in  $\mathbf{X}$  is not maximally predictive.
- **Markov blanket:** A Markov blanket  $\mathbf{M}$  of the response variable  $T \in \mathbf{V}$  in the joint probability distribution  $P$  over variables  $\mathbf{V}$  is a set of variables conditioned on which all other variables are independent of  $T$ , i.e. for every  $X \in (\mathbf{V} \setminus \mathbf{M} \setminus \{T\})$ ,  $T \perp X | \mathbf{M}$ .
- **Market boundary:** If  $\mathbf{M}$  is a Markov blanket of  $T$  and no proper subset of  $\mathbf{M}$  satisfies the definition of Markov blanket of  $T$ , then  $\mathbf{M}$  is called a Markov boundary of  $T$ .

**Theorem:** If  $\mathcal{W}$  is a performance metric that is maximized only when  $P(T | \mathbf{V} \setminus \{T\})$  is estimated accurately and  $L$  is a learning algorithm that can approximate any probability distribution, then  $\mathbf{M}$  is a Markov blanket of  $T$  if and only if the learner’s model induced using variables  $\mathbf{M}$  is a maximally predictive signature of  $T$ .

*Proof:* First we prove that the learner’s model induced using any Markov blanket of  $T$  is a maximally predictive signature of  $T$ . If  $\mathbf{M}$  is Markov blanket of  $T$ , then by definition it leads to a maximally predictive signature of  $T$  because  $P(T | \mathbf{M}) = P(T | \mathbf{V} \setminus \{T\})$  and this distribution can be perfectly approximated by  $L$ , which implies that  $\mathcal{W}$  will be maximized. Now we prove that any maximally predictive signature of  $T$  is the learner’s model induced using a Markov blanket of  $T$ . Assume that  $\mathbf{X} \subseteq \mathbf{V} \setminus \{T\}$  is a set of variables used in the maximally predictive signature of  $T$  but it is not a Markov blanket of  $T$ . This implies that,  $P(T | \mathbf{X}) \neq P(T | \mathbf{V} \setminus \{T\})$ . By definition of the Markov blanket,  $\mathbf{V} \setminus \{T\}$  is always a Markov blanket of  $T$ . By first part of the theorem,  $\mathbf{V} \setminus \{T\}$  leads to a maximally predictive signature of  $T$  similarly to  $\mathbf{X}$ . Therefore, the following should hold:  $P(T | \mathbf{X}) = P(T | \mathbf{V} \setminus \{T\})$ . This contradicts the assumption that  $\mathbf{X}$  is not a Markov blanket of  $T$ . Therefore,  $\mathbf{X}$  is a Markov blanket of  $T$ . (Q.E.D.)

Since the notion of non-redundancy is defined in the same way for maximally predictive signatures and for Markov blankets, under the assumptions of the above theorem it follows that  $\mathbf{M}$  is a Markov boundary of  $T$  if and only if the learner's model induced using variables  $\mathbf{M}$  is a maximally predictive and non-redundant signature of  $T$ .
