# Supplementary material for: Analysis and Computational Dissection of Molecular Signature Multiplicity
Source: PLOS journal article supplement (doi:10.1371/journal.pcbi.1000790), 2010-05-20
Supplement: S15 (10.1371/journal.pcbi.1000790.s015) [file journal.pcbi.1000790.s015]

**The number of maximally predictive and non-redundant signatures is worst-case exponential to the number of variables**

Consider a simplified pathway structure and parameterization shown in the figure below. It involves  $n$  genes ( $X_1, X_2, \dots, X_n$ ) and a phenotypic response variable  $T$ . Genes  $X_i$  ( $i = 1, \dots, n$ ) can be divided into  $m$  groups such that any two genes in a group contain exactly the same information about  $T$ . Since there are  $n/m$  genes in each group, the total number of Markov boundaries is  $(n/m)^m$ . Now assume that  $m = kn$ , where  $k < 1$ . Then the total number of Markov boundaries is  $(1/k)^{kn}$ . Since  $1/k > 1$  and  $kn = O(n)$ , it follows that the number of Markov boundaries grows exponentially with the number of variables in this example.

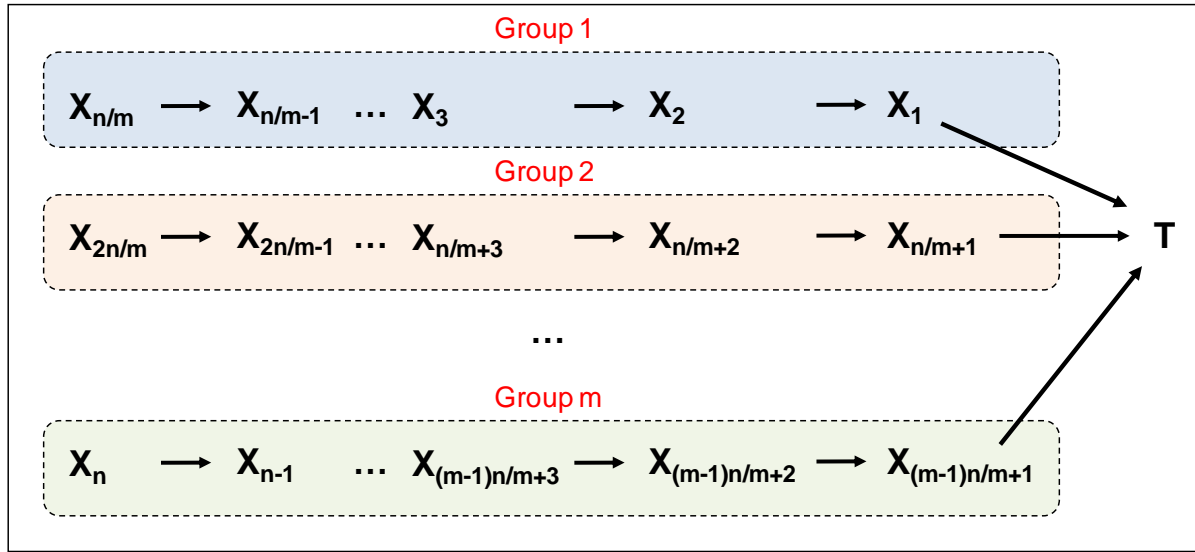

| $P(T   X_1, X_{n/m+1}, \dots, X_{(m-1)n/m+1})$ | $(X_1=0, X_{n/m+1}=0, \dots, X_{(m-1)n/m+1}=0)$ | $(X_1=0, X_{n/m+1}=0, \dots, X_{(m-1)n/m+1}=1)$ | ... | $(X_1=1, X_{n/m+1}=1, \dots, X_{(m-1)n/m+1}=1)$ |
|------------------------------------------------|-------------------------------------------------|-------------------------------------------------|-----|-------------------------------------------------|
| $T=0$                                          | 0.2                                             | 0.8                                             |     | 0.2                                             |
| $T=1$                                          | 0.8                                             | 0.2                                             |     | 0.8                                             |

For any pair of genes  $X_j$  and  $X_k$  belonging to the same group  $i$ :

| $P(X_j   X_k)$ | $X_k = 0$ | $X_k = 1$ |
|----------------|-----------|-----------|
| $X_j = 0$      | 1.0       | 0.0       |
| $X_j = 1$      | 0.0       | 1.0       |

**Figure:** Example pathway structure with  $n$  gene variables ( $X_1, X_2, \dots, X_n$ ) and phenotypic response variable  $T$ . The structure is represented by a Bayesian network. The network parameterization is defined below the graph. All variables take values  $\{0,1\}$ .
