# Supplementary material for: Analysis and Computational Dissection of Molecular Signature Multiplicity
Source: PLOS journal article supplement (doi:10.1371/journal.pcbi.1000790), 2010-05-20
Supplement: S16 (10.1371/journal.pcbi.1000790.s016) [file journal.pcbi.1000790.s016]

### An example of signature multiplicity due to hidden variables

Consider a simplified pathway structure and parameterization shown in the figure below. It involves 3 genes ( $H$ ,  $X_1$ ,  $X_2$ ) and a phenotypic response variable  $T$ . In the distribution with all variables observed, there is only one Markov boundary of  $T$ , which is  $\{H\}$ . Now consider that gene  $H$  is not observed in the data (i.e., it is hidden). Because  $H$  is not observed and genes  $X_1$  and  $X_2$  contain exactly the same information about  $T$ , two Markov boundaries  $\{X_1\}$  and  $\{X_2\}$  can be identified in this distribution. Notice that all these Markov boundaries have reproducible but suboptimal (relative to the original distribution with  $H$  observed) predictivity of the response variable  $T$ .

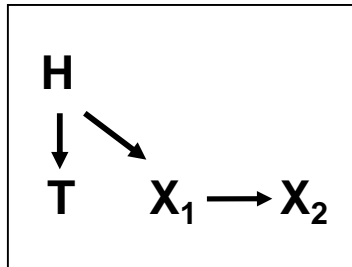

| $P(T   H)$ | $H = 0$ | $H = 1$ |
|------------|---------|---------|
| $T = 0$    | 0.9     | 0.2     |
| $T = 1$    | 0.1     | 0.8     |

| $P(X_1   H)$ | $H = 0$ | $H = 1$ |
|--------------|---------|---------|
| $X_1 = 0$    | 0.9     | 0.1     |
| $X_1 = 1$    | 0.1     | 0.9     |

| $P(X_2   X_1)$ | $X_1 = 0$ | $X_1 = 1$ |
|----------------|-----------|-----------|
| $X_2 = 0$      | 1.0       | 0.0       |
| $X_2 = 1$      | 0.0       | 1.0       |

**Figure:** Example pathway structure with 3 gene variables ( $H$ ,  $X_1$ ,  $X_2$ ) and phenotypic response variable  $T$ . The structure is represented by a Bayesian network. The network parameterization is defined below the graph. All variables take values  $\{0,1\}$ .
