# Supplementary material for: Analysis and Computational Dissection of Molecular Signature Multiplicity
Source: PLoS Comput Biol. 2010 May 20;6(5):e1000790. doi: 10.1371/journal.pcbi.1000790 (PMC2873900; doi:10.1371/journal.pcbi.1000790)
Supplement: Text S2 — An example of signature multiplicity due to small samples. (0.08 MB PDF) [file pcbi.1000790.s010.pdf]

## An example of signature multiplicity due to small samples

Consider a simplified pathway structure and parameterization shown in the figure below. It involves 4 genes ( $A, B, C, D$ ) and a phenotypic response variable  $T$ . This network encodes a faithful distribution<sup>1</sup> and thus only one Markov boundary exists in large samples [1–4], which is  $\{C, D\}$ . Now consider that we have access to three small samples from this distribution such that: in sample #1 one cannot reliably establish that  $T \perp A | \{C, D\}$ , in sample #2 one cannot reliably establish that  $T \perp B | \{C, D\}$ , and in sample #3 one cannot reliably establish either  $T \perp A | \{C, D\}$  or  $T \perp B | \{C, D\}$ . Three Markov boundaries can be identified in the above samples,  $\{C, D, A\}$ ,  $\{C, D, B\}$ , and  $\{C, D, A, B\}$ , respectively, assuming that neither  $A$  nor  $B$  significantly decreases the predictivity of  $T$  in given samples.

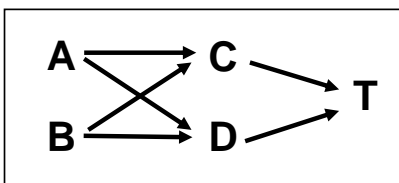

| $P(T   C, D)$ | $(C = 0, D = 0)$ | $(C = 0, D = 1)$ | $(C = 1, D = 0)$ | $(C = 1, D = 1)$ |
|---------------|------------------|------------------|------------------|------------------|
| $T = 0$       | 0.2              | 0.5              | 0.7              | 0.4              |
| $T = 1$       | 0.8              | 0.5              | 0.3              | 0.6              |

| $P(C   A, B)$ | $(A = 0, B = 0)$ | $(A = 0, B = 1)$ | $(A = 1, B = 0)$ | $(A = 1, B = 1)$ |
|---------------|------------------|------------------|------------------|------------------|
| $C = 0$       | 0.3              | 0.7              | 0.9              | 0.4              |
| $C = 1$       | 0.7              | 0.3              | 0.1              | 0.6              |

| $P(D   A, B)$ | $(A = 0, B = 0)$ | $(A = 0, B = 1)$ | $(A = 1, B = 0)$ | $(A = 1, B = 1)$ |
|---------------|------------------|------------------|------------------|------------------|
| $D = 0$       | 0.6              | 0.7              | 0.8              | 0.4              |
| $D = 1$       | 0.4              | 0.3              | 0.2              | 0.6              |

| $P(A)$  |     |
|---------|-----|
| $A = 0$ | 0.6 |
| $A = 1$ | 0.4 |

| $P(B)$  |     |
|---------|-----|
| $B = 0$ | 0.4 |
| $B = 1$ | 0.6 |

**Figure:** Example pathway structure with 4 gene variables ( $A, B, C, D$ ) and phenotypic response variable  $T$ . The structure is represented by a Bayesian network. The network parameterization is defined below the graph. All variables take values  $\{0,1\}$ .

<sup>1</sup> Let  $G$  be a graph and  $P$  a probability distribution. We will call a distribution  $P$  faithful to  $G$  if and only if every conditional independence relation true in  $P$  is entailed by the Markov Condition applied to  $G$ . In other words, the graph  $G$  using the Markov Condition provides an accurate map of all conditional and marginal dependencies and independencies in  $P$ . Recall that a probability distribution  $P$  satisfies the Markov Condition with respect to a graph  $G$  over variables  $\mathbf{V}$  if for every variable  $W$  in  $\mathbf{V}$ ,  $W$  is independent of all non-descendants of  $W$  given the parents of  $W$  [1].

## References

1. Spirtes, P., Glymour, C. N., and Scheines, R. (2000) Causation, prediction, and search. Cambridge, Mass: MIT Press.
2. Pearl, J. (1988) Probabilistic reasoning in intelligent systems: networks of plausible inference. San Mateo, California: Morgan Kaufmann Publishers.
3. Pearl, J. (2000) Causality: models, reasoning, and inference. Cambridge, U.K: Cambridge University Press.
4. Tsamardinos I, Aliferis CF (2003) Towards principled feature selection: relevancy, filters and wrappers. Proceedings of the Ninth International Workshop on Artificial Intelligence and Statistics (AI & Stats) .
